# Supplementary material
Source: HighWire-hosted journal article supplement (https://molpharm.aspetjournals.org/highwire/filestream/77277/field_highwire_adjunct_files/0/Supplimentary_Figure-PDF_93039.pdf)

**Supplemental Data**

**Title:**

**Globular Adiponectin Inhibits Ethanol–Induced ROS Production through Modulation of NADPH Oxidase in Macrophages: Involvement of LKB1/AMPK pathway**

**Authors:**

Mi Jin Kim, Laura E. Nagy and Pil-Hoon Park

**Journal Title:**

Molecular Pharmacology

**Legends for Supplemental Figures:**

**Supplementary Figure 1. Effect of globular adiponectin on ROS production in RAW 264.7 macrophages.** (A) Cells cultured in 96-well black plate were treated with globular adiponectin in a dose-dependent manner for 24 h. ROS production by adiponectin treatment was determined using fluorometer. Data are expressed as mean  $\pm$  SEM (n = 5). \*  $P < 0.05$  compared with control. (B) Cells were treated with different concentration of adiponectin in a

time-dependent manner. ROS generation was determined as described previously. Values are expressed as fold change relative to control cells. \*  $P < 0.05$  compared with control

**Supplementary Figure 2. Effect of AICAR on phosphorylation of AMPK in RAW 264.7 macrophages treated with ethanol.** Cells were pretreated with 1 mM AICAR for 1 h followed by stimulation with ethanol for additional 24 h. The level of phosphorylated AMPK $\alpha$  was measured by Western blot analysis as described previously.

## Supplementary Figure 1.

(A)

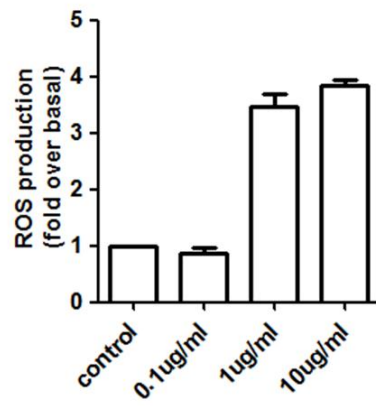

(B)

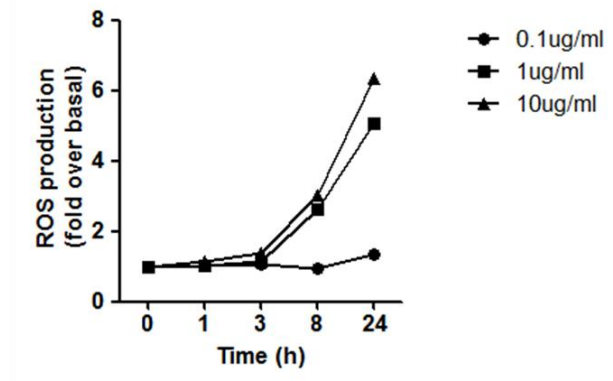

Supplementary Figure 2.

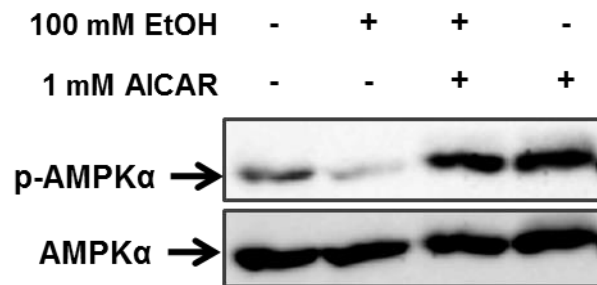

Supplement: Supplimentary_Figure-PDF_93039.pdf [file Supplimentary_Figure-PDF_93039.pdf]
